# Supplementary material
Source: ML conference proceedings conference paper supplement (https://proceedings.mlr.press/v97/panageas19a.html)
Supplement: Supplementary file 1 [file panageas19a-supp.pdf]

---

# Supplementary Material for Multiplicative Weights Updates as a Distributed Constrained Optimization Algorithm: Convergence to Second-order Stationary Points Almost Always

---

Ioannis Panageas<sup>1</sup> Georgios Piliouras<sup>1</sup> Xiao Wang<sup>1</sup>

## A. Stable manifold theorem

**Theorem A.1** (Center-stable manifold theorem, III.7 (Shub, 1987)). *Let  $x^*$  be a fixed point for the  $C^r$  local diffeomorphism  $g : \mathcal{X} \rightarrow \mathcal{X}$ . Suppose that  $E = E_s \oplus E_u$ , where  $E_s$  is the span of the eigenvectors corresponding to eigenvalues of magnitude less than or equal to one of  $Dg(x^*)$ , and  $E_u$  is the span of the eigenvectors corresponding to eigenvalues of magnitude greater than one of  $Dg(x^*)$ <sup>1</sup>. Then there exists a  $C^r$  embedded disk  $W_{loc}^{cs}$  of dimension  $\dim(E^s)$  that is tangent to  $E_s$  at  $x^*$  called the local stable center manifold. Moreover, there exists a neighborhood  $B$  of  $x^*$ , such that  $g(W_{loc}^{cs}) \cap B \subset W_{loc}^{cs}$ , and  $\bigcap_{k=0}^{\infty} g^{-k}(B) \subset W_{loc}^{cs}$ .*

## B. Preliminaries on Topology

This section provides fundamentals used in the proof of Theorem 2.3. For more information on proper maps and the fundamental group, see (Ho, 1975) and (Hatcher, 2002).

**Definition B.1.**  $X$  is a *Hausdorff space* if for every pair of points  $p, q \in X$ , there are disjoint open subsets  $U, V \subset X$  such that  $p \in U$  and  $q \in V$ .

**Definition B.2.** Let  $X$  and  $Y$  are topological spaces. A map from  $X$  to  $Y$ , denoted  $f : X \rightarrow Y$ , is called *proper* if the inverse of each compact subset of  $Y$  is a compact subset of  $X$ .

**Example B.3.** Let  $X$  be a compact space and  $Y$  be a Hausdorff space. And suppose  $f : X \rightarrow Y$  is continuous. Then  $f$  is a proper map. Furthermore, if  $D$  is compact subset of  $\mathbb{R}^n$ , then a continuous map  $f : D \rightarrow D$  is proper.

**Definition B.4.** A topological space  $X$  is *connected* if there are no disjoint open subsets  $U, V \subset X$ , such that  $U \cup V = X$ .

---

<sup>1</sup>Singapore University of Technology and Design, Singapore. Correspondence to: Ioannis Panageas <ioannis@sutd.edu.sg>, Georgios Piliouras <georgios@sutd.edu.sg>, Xiao Wang <xiao.wang@sutd.edu.sg>.

<sup>1</sup>Jacobian of function  $g$ .

**Definition B.5.** A *path* from a point  $x$  to a point  $y$  in a topological space  $X$  is a continuous function  $f : [0, 1] \rightarrow X$  with  $f(0) = x$  and  $f(1) = y$ . The space  $X$  is said to be *path-connected* if there exists a path joining any two points in  $X$ . A *homotopy* of paths in  $X$  is a family  $f_t : [0, 1] \rightarrow X$ ,  $0 \leq t \leq 1$ , such that

- The endpoints  $f_t(0) = x_0$  and  $f_t(1) = x_1$  are independent of  $t$ .
- The associated map  $F : [0, 1] \times [0, 1] \rightarrow X$  defined by  $F(s, t) = f_t(s)$  is continuous.

When two paths  $f_0$  and  $f_1$  are connected in this way by a homotopy  $f_t$ , they are said to be *homotopic*. The notation for this is  $f_0 \simeq f_1$ .

**Proposition B.6.** *The relation of homotopy on paths with fixed endpoints in any space is an equivalence relation.*

The equivalence class of a path  $f$  under the equivalence relation of homotopy is denoted  $[f]$  and called the *homotopy class* of  $f$ .

Given two paths  $f, g : [0, 1] \rightarrow X$  such that  $f(1) = g(0)$ , there is a *product path*  $f \cdot g$  that traverses first  $f$  and then  $g$ , defined by the formula

$$f \cdot g(s) = \begin{cases} f(2s), & [1 \leq s \leq \frac{1}{2}] \\ g(2s - 1), & [\frac{1}{2} \leq s \leq 1] \end{cases}$$

**Definition B.7.** The paths with the same starting and ending point are called *loops*, and the common starting and ending point is called the *basepoint*. The set of all homotopy classes  $[f]$  of loops  $f : [0, 1] \rightarrow X$  at the basepoint  $x_0$  is denoted  $\pi_1(X, x_0)$ .

**Proposition B.8.**  $\pi_1(X, x_0)$  is a group with respect to the product  $[f][g] = [f \cdot g]$ .

And the group  $\pi_1(X, x_0)$  is called the *fundamental group*.

**Definition B.9.** A topological space  $X$  is *simply connected* if it is path-connected and has trivial fundamental group.

**Example B.10.** The space  $D$  that is a product of simplexes is simply-connected.

The following theorem (used in the proof of Theorem 2.3) gives a sufficient and necessary condition under which a local homeomorphism  $f : X \rightarrow Y$  becomes a global homeomorphism.

**Theorem B.11** (Theorem 2, (Ho, 1975)). *Let  $X$  be path-connected and  $Y$  be simply-connected Hausdorff spaces. A local homeomorphism  $f : X \rightarrow Y$  is a global homeomorphism of  $X$  to  $Y$  if and only if the map  $f$  is proper.*

## References

- Hatcher, A. *Algebraic Topology*. Cambridge University Press, 2002.
- Ho, C. A note on proper maps. In *Proceedings of the American Mathematical Society*, 1975.
- Shub, M. *Global Stability of Dynamical Systems*. Springer Science and Business Media, 1987.
